# Supplementary material
Source: bioRxiv or medRxiv preprint supplement (https://medrxiv.org/highwire/filestream/92217/field_highwire_adjunct_files/3/2020.08.04.20167312-4.pdf)

**a**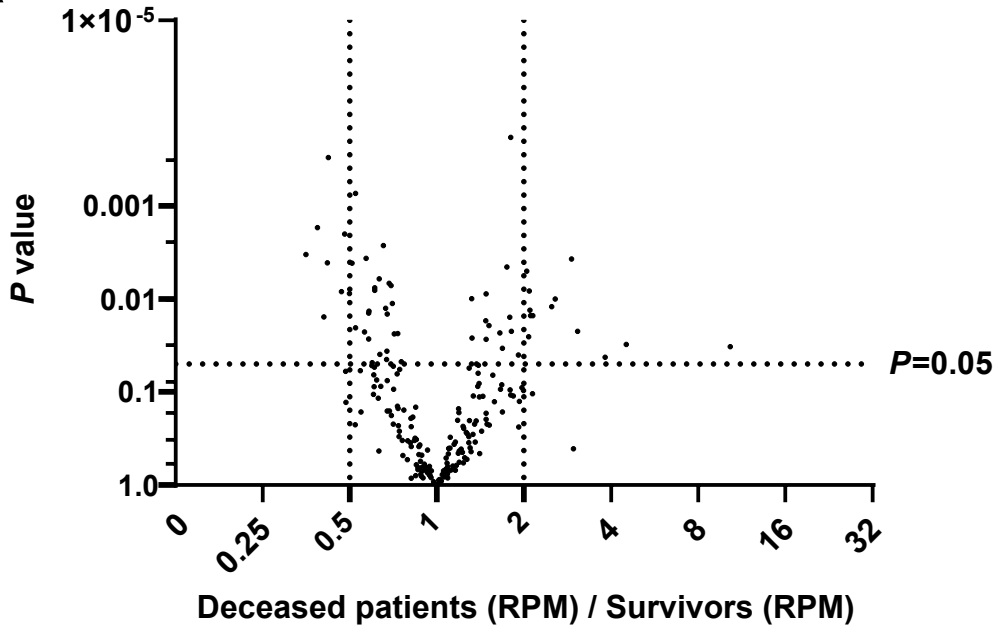**b**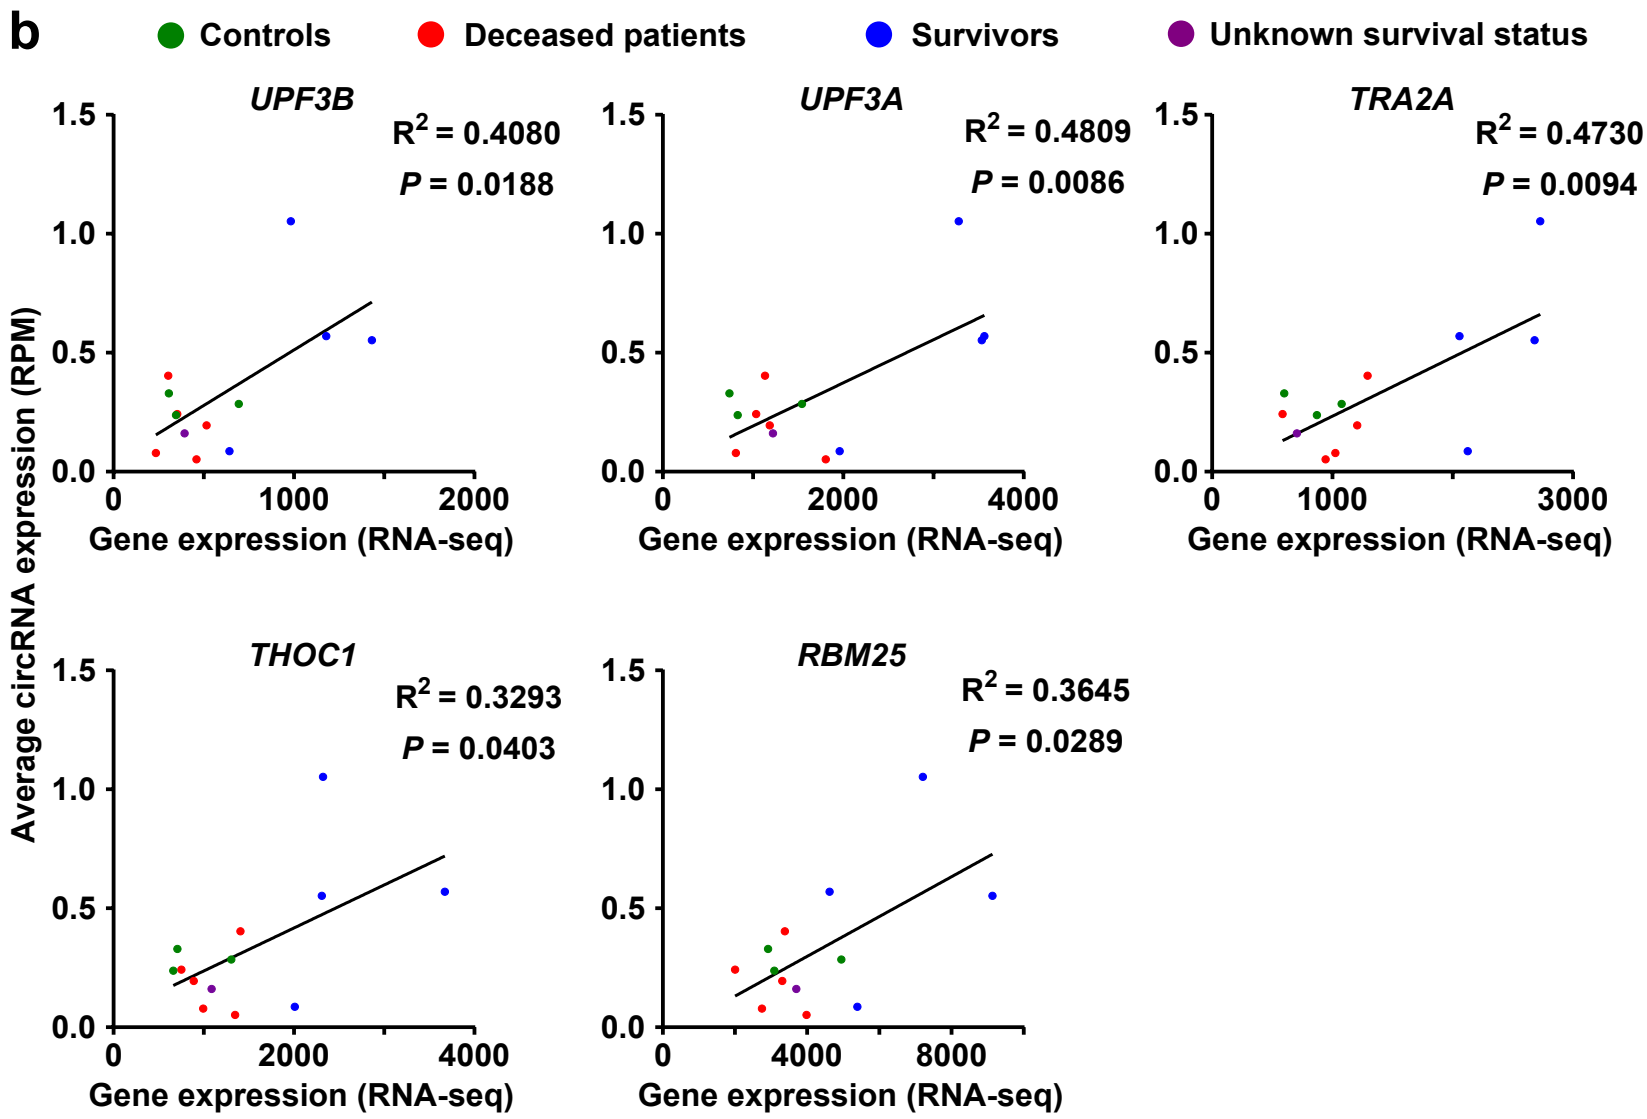

Supplement: Supplementary file [file 2020.08.04.20167312-4.pdf]
